# Supplementary material for: Water as an agent for the morphology modification of metal oxalate materials on the nanoscale: from sheets to rods
Source: PubMed Central journal article supplement (PMC4725861; doi:10.1038/srep19282), 2016-01-14
Supplement: srep19282-s1.pdf [file srep19282-s1.pdf]

# Supporting Information

## Water as an agent for the morphology modification of metal oxalate materials on the nanoscale: from sheets to rods

Minog Kim,<sup>1</sup> YooJin Kim,<sup>2</sup> Won Jong Kwon<sup>3</sup> and Sungho Yoon,<sup>1,\*</sup>

### Contents

#### I. Zinc oxalate ( $\text{ZnC}_2\text{O}_4$ ) precursors

- A. Experimental information
- B. X-ray structure of  $[\text{Zn}(\text{C}_2\text{O}_4)(\text{EG})]$  compound (1)
- C. FT-IR spectra of the synthesized-samples
- D. TGA-DTA analysis of nanosheet-shaped  $[\text{Zn}(\text{C}_2\text{O}_4)(\text{EG})]$  complex
- E. HR-TEM images of nanosheet-shaped  $[\text{Zn}(\text{C}_2\text{O}_4)(\text{EG})]$  complex
- F. AFM analysis of nanorod-shaped  $[\text{Zn}(\text{C}_2\text{O}_4)(\text{OH}_2)_2]$  complex
- G. TGA-DTA analysis of nanorod-shaped  $[\text{Zn}(\text{C}_2\text{O}_4)(\text{EG})_x(\text{OH}_2)_y]$  complex
- H. TGA-DTA analysis of nanorod-shaped  $[\text{Zn}(\text{C}_2\text{O}_4)(\text{OH}_2)_2]$  complex
- I. The corresponding geometric structure of nanorod-shaped  $[\text{Zn}(\text{C}_2\text{O}_4)(\text{OH}_2)_2]$  complex
- J. Change of Zn-O distance, hydrogen bond distance and hydrogen bond angle

#### II. Cobalt oxalate ( $\text{CoC}_2\text{O}_4$ ) precursors

- K. Experimental information
- L. SEM, XRD and TGA analyses of  $[\text{Co}(\text{C}_2\text{O}_4)(\text{EG})]$  complex and FT-IR spectra of the synthesized-samples
- M. SEM, XRD, HR-TEM, FTT and TGA analyses of nanorod-shaped  $[\text{Co}(\text{C}_2\text{O}_4)(\text{EG})_x(\text{OH}_2)_y]$  and nanorod-shaped  $[\text{Co}(\text{C}_2\text{O}_4)(\text{OH}_2)_2]$

#### III. ZnO and $\text{Co}_3\text{O}_4$

- N. SEM, HR-TEM, FTT images and XRD graphs of the prepared-ZnO samples
- O. SEM, HR-TEM, FTT images and XRD graphs of the prepared- $\text{Co}_3\text{O}_4$

## **A. Experimental information**

### **Materials**

Oxalic acid (Aldrich,  $\geq 99.0\%$ ), zinc sulfate heptahydrate (Aldrich,  $\geq 99.0\%$ ) and cobalt sulfate heptahydrate (Aldrich,  $\geq 99.0\%$ ) were dehydrated at  $200\text{ }^{\circ}\text{C}$  under vacuum overnight. Anhydrous ethylene glycol (Aldrich,  $99.8\%$ ) and anhydrous tetrahydrofuran (Aldrich,  $\geq 99.9\%$ ) were used as received without further purification. Water was distilled twice. Molecular sieves ( $3\text{ }\text{\AA}$ , Aldrich) were washed with acetone and vacuum-dried at  $200\text{ }^{\circ}\text{C}$  before use. Ethanol (Daejung,  $94\%$ ) was used.

### **Synthesis of nanosheet-shaped $[\text{Zn}(\text{C}_2\text{O}_4)(\text{EG})]$ complex (1)**

Oxalic acid ( $1.00\text{ mmol}$ ,  $\text{H}_2\text{C}_2\text{O}_4$ ) was dissolved in ethylene glycol ( $15\text{ mL}$ ), followed by the addition of zinc sulfate ( $1.00\text{ mmol}$ ,  $\text{ZnSO}_4$ ) and ca.  $0.70\text{ g}$   $3\text{ }\text{\AA}$  molecular sieves. After stirring for  $2\text{ h}$ , the white precipitate was washed with  $33\text{ mL}$  of anhydrous tetrahydrofuran (THF) and isolated by centrifugation for 3 times ( $\leq 0.48\text{ mmol}$  of water). The obtained powder was dried in a vacuum oven at  $60\text{ }^{\circ}\text{C}$  overnight.

\* Anhydrous THF was used in the consideration of the tough nature that azeotropic mixture is hard to be separated from water, even though the same phenomenon was observed upon using anhydrous ethanol. As a result of the study, it was observed that solvents with water excluded as much as possible, such as anhydrous methanol, anhydrous ethanol, and anhydrous THF, bring the same result.

### **Synthesis of nanorod-shaped $[\text{Zn}(\text{C}_2\text{O}_4)(\text{EG})_x(\text{OH}_2)_y]$ complex**

Oxalic acid ( $1.00\text{ mmol}$ ,  $\text{H}_2\text{C}_2\text{O}_4$ ) was dissolved in ethylene glycol ( $15\text{ mL}$ ), followed by the addition of zinc sulfate ( $1.00\text{ mmol}$ ,  $\text{ZnSO}_4$ ) and ca.  $0.70\text{ g}$   $3\text{ }\text{\AA}$  molecular sieves. After stirring for  $2\text{ h}$ , the white precipitate was washed with  $33\text{ mL}$  of ethanol ( $94\%$ ) and isolated by for 3 times ( $\leq 260\text{ mmol}$  of water). The obtained powder was dried in a vacuum oven at  $60\text{ }^{\circ}\text{C}$  overnight.

### **Synthesis of nanorod-shaped $[\text{Zn}(\text{C}_2\text{O}_4)(\text{OH}_2)_2]$ complex**

Oxalic acid ( $1.00\text{ mmol}$ ,  $\text{H}_2\text{C}_2\text{O}_4$ ) was dissolved in ethylene glycol ( $15\text{ mL}$ ), followed by the addition of zinc sulfate ( $1.00\text{ mmol}$ ,  $\text{ZnSO}_4$ ) and ca.  $0.70\text{ g}$   $3\text{ }\text{\AA}$  molecular sieves. After stirring for  $2\text{ h}$ , the

white precipitate was washed with 33 mL of ethanol (94%) and isolated by centrifugation for 4 times ( $\leq 350$  mmol of water). The obtained powder was dried in a vacuum oven at  $60\text{ }^{\circ}\text{C}$  overnight.

### **Synthesis of porous ZnO structures**

The as-prepared zinc oxalate structures were annealed in air at  $500\text{ }^{\circ}\text{C}$  for 2 h at a heating rate of  $2\text{ }^{\circ}\text{C}/\text{min}$  for converting to the porous ZnO structures.

### **Characterization**

The morphologies of the as-prepared products were characterized by field emission scanning electron microscopy (a Hitachi FE-SEM S-4800). The Fourier transform-infrared (FT-IR) spectra were measured on JASCO FT/IR 460 PLUS using the KBr pellet method at room temperature. Thermogravimetric analysis/differential thermal analysis (TGA/DTA) was performed on TA instruments STA-1500 under  $\text{N}_2$  gas ( $100\text{ mL}/\text{min}$ ) from room temperature to  $600\text{ }^{\circ}\text{C}$  at a heating rate of  $10\text{ }^{\circ}\text{C}/\text{min}$ . The thickness of nanorod-shaped  $[\text{Zn}(\text{C}_2\text{O}_4)(\text{OH}_2)_2]$  was determined by atomic force microscopy (AFM) (Seiko instrument model SPA 400) operated in non-contact mode (Si Cantilever). High-resolution transmission electron microscopy (HRTEM) images were taken on JEOL JEM-2100F. The nanosheet-shaped  $[\text{Zn}(\text{C}_2\text{O}_4)(\text{EG})]$  powder particles were dispersed in THF (99%), dropped on an ultrathin holey carbon support film, and then dried in air. The rod-shaped  $[\text{Zn}(\text{C}_2\text{O}_4)(\text{OH}_2)_2]$  powder particles were ultrasonically dispersed in ethanol, dropped on a copper grid and then dried in air. Crystal structures of the as-prepared products were characterized by powder X-ray diffraction (XRD) on a Bruker D8 Focus X-ray powder diffractometer using  $\text{CuK}\alpha$  radiation. BET surface area and  $\text{N}_2$  adsorption–desorption measurements were conducted at  $77\text{ K}$  using an automated gas sorption system (Belsorp II mini, BEL Japan, Inc.).

**B. X-ray structure of [Zn(C<sub>2</sub>O<sub>4</sub>)(EG)] compound (1)**

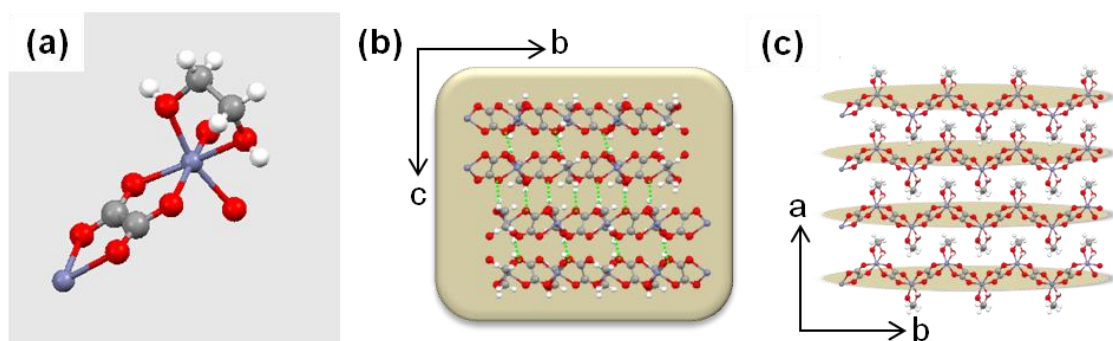

**Fig. S1** Illustrated-structures of **1** having nanosheet shape (white: hydrogen, gray: carbon, red: oxygen, and blue: zinc): (a) single unit of [Zn(C<sub>2</sub>O<sub>4</sub>)(EG)], (b) *bc* plane (green-colored lines: H-bonding interactions) and (c) *ab* plane.

### C. FT-IR spectra of the synthesized-samples

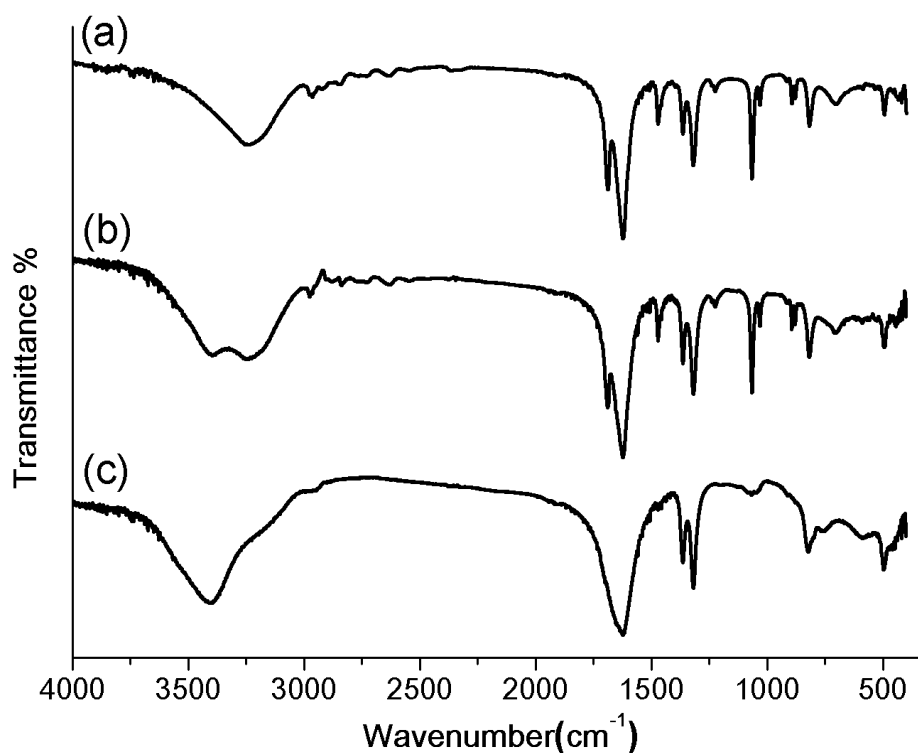

| (a)  | (b)  | (c)  | Assignment                        |
|------|------|------|-----------------------------------|
|      | 3393 | 3393 | O-H stretch                       |
| 3247 | 3247 |      |                                   |
| 1687 | 1687 |      | C=O stretch                       |
| 1621 | 1621 | 1628 |                                   |
| 1471 | 1471 |      | C-H bend (alkane)                 |
| 1364 | 1364 | 1363 | symmetric and asymmetric<br>O-C-O |
| 1319 | 1319 | 1317 |                                   |
| 1226 | 1226 |      | non-identified                    |
| 1065 | 1065 |      | O-C stretch                       |
| 1032 | 1032 |      |                                   |
| 893  | 893  |      | non-identified                    |
| 878  | 878  |      | non-identified                    |
| 819  | 819  | 820  | asymmetric O-C-O band             |
| 494  | 494  | 494  | Zn-O stretch                      |

**Fig. S2** FT-IR spectra of (a) nanosheet-shaped  $[\text{Zn}(\text{C}_2\text{O}_4)(\text{EG})]$  complex, (b) nanorod-shaped  $[\text{Zn}(\text{C}_2\text{O}_4)(\text{EG})_x(\text{OH}_2)_y]$  complex and (c) nanorod-shaped  $[\text{Zn}(\text{C}_2\text{O}_4)(\text{OH}_2)_2]$ .

#### D. TGA-DTA analysis of nanosheet-shaped $[\text{Zn}(\text{C}_2\text{O}_4)(\text{EG})]$ complex

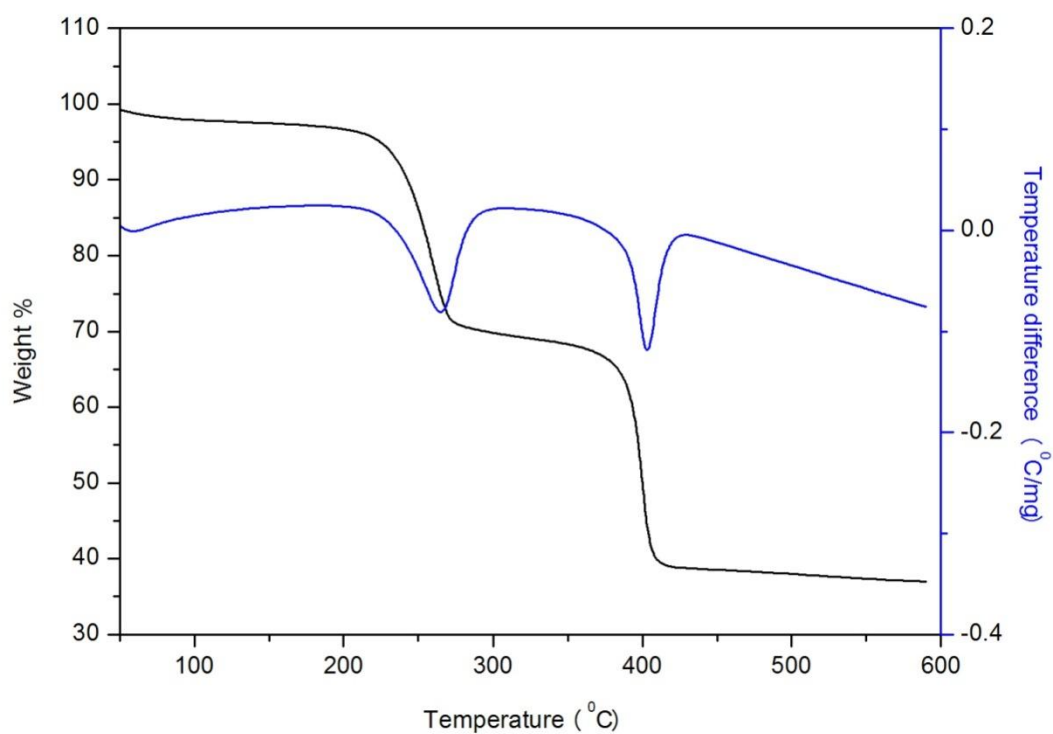

| Temperature ( $^{\circ}\text{C}$ ) | Endothermic peak ( $^{\circ}\text{C}$ ) | Weight loss     |              | Assignment               |
|------------------------------------|-----------------------------------------|-----------------|--------------|--------------------------|
|                                    |                                         | Theoretical (%) | Observed (%) |                          |
| 200~299                            | 265                                     | 28.81           | 27.75        | EG                       |
| 345~440                            | 403                                     | 33.42           | 32.19        | $\text{CO}, \text{CO}_2$ |
|                                    |                                         | 37.77           | 40.06        | ZnO                      |

**Fig. S3** TGA-DTA analysis of nanosheet-shaped  $[\text{Zn}(\text{C}_2\text{O}_4)(\text{EG})]$  complex (Black: TGA, Blue: DTA).

### E. HR-TEM images of nanosheet-shaped $[\text{Zn}(\text{C}_2\text{O}_4)(\text{EG})]$ complex

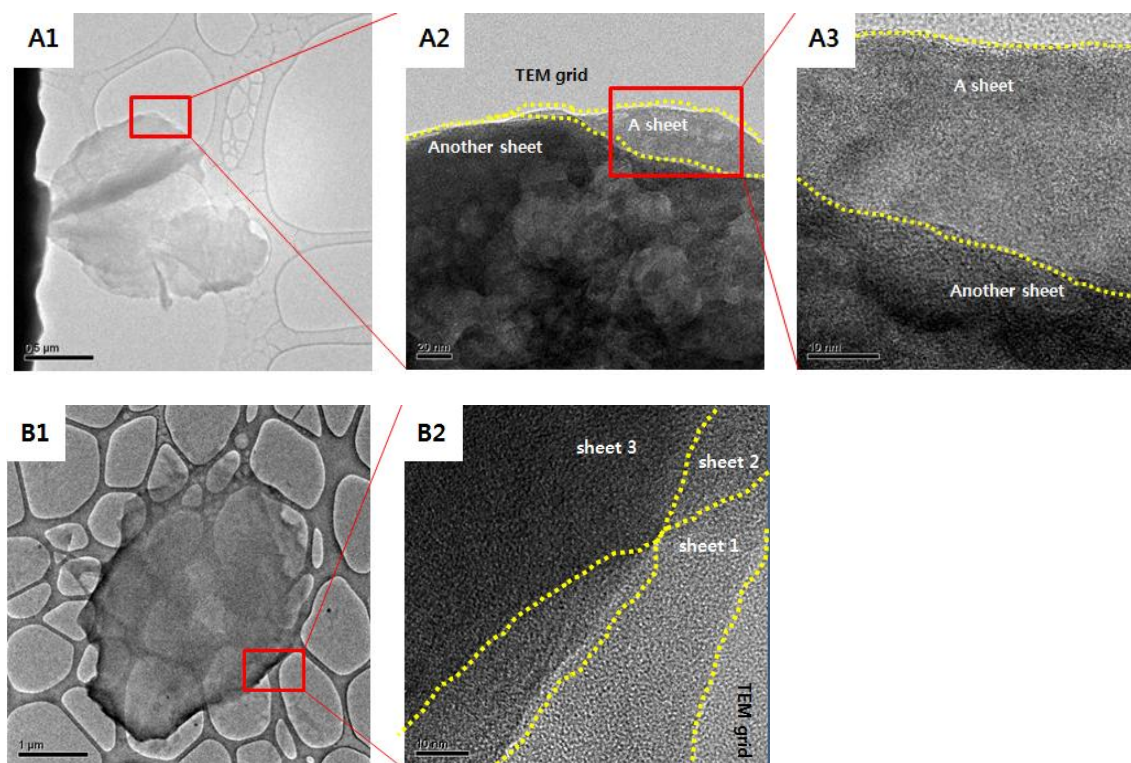

**Fig. S4** High-resolution transmission electron microscopy (HRTEM) images of stacked several thin sheets consisting of  $[\text{Zn}(\text{C}_2\text{O}_4)(\text{EG})]$ .

### F. AFM analysis of nanorod-shaped $[\text{Zn}(\text{C}_2\text{O}_4)(\text{OH}_2)_2]$ complex

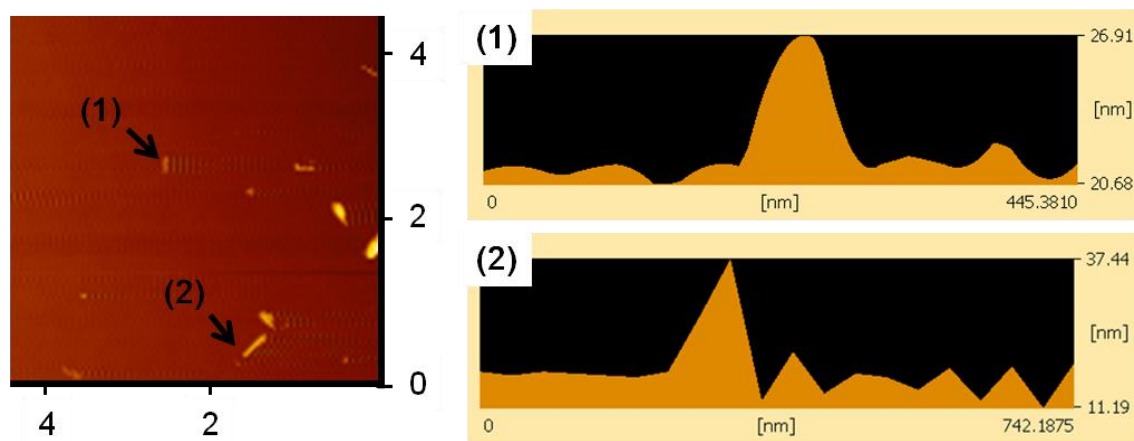

**Fig. S5** Atomic-force microscopy (AFM) image and thickness profiles of nanorod-shaped  $[\text{Zn}(\text{C}_2\text{O}_4)(\text{OH}_2)_2]$  indicate that the average thickness is about 30 nm.



**G. TGA-DTA analysis of nanorod-shaped  $[\text{Zn}(\text{C}_2\text{O}_4)(\text{EG})_x(\text{OH}_2)_y]$  complex**

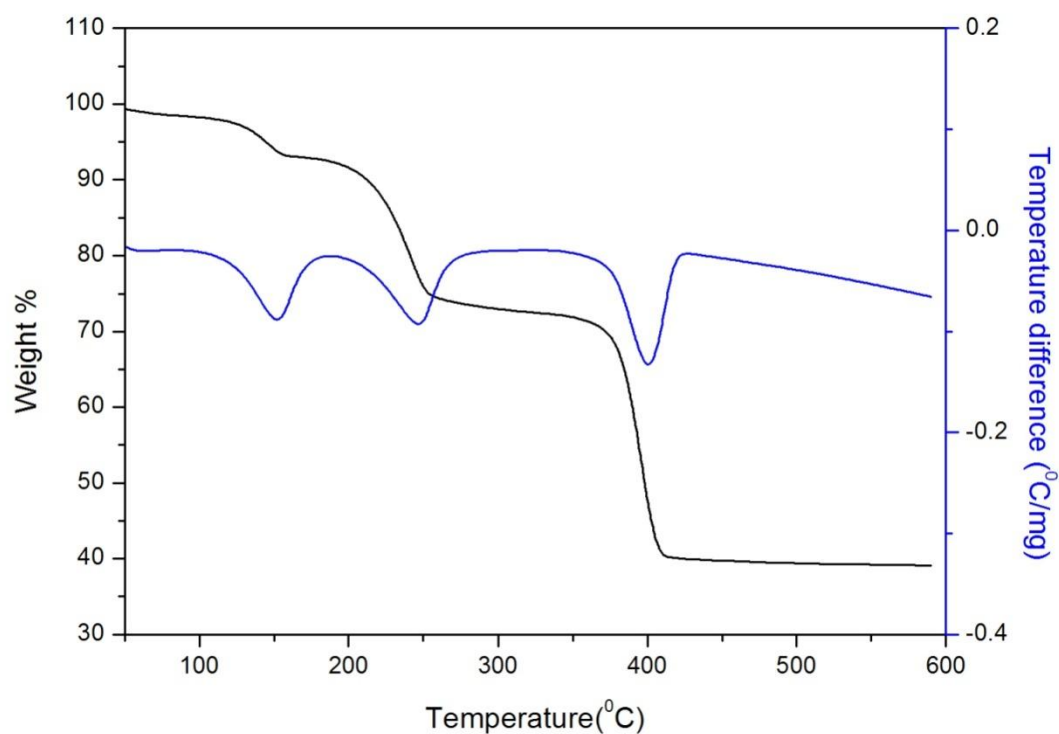

| Temperature (°C) | Endothermic peak (°C) | Weight loss  | Assignment               |
|------------------|-----------------------|--------------|--------------------------|
|                  |                       | Observed (%) |                          |
| 94~184           | 152                   | 5.85         | $(\text{OH}_2)_y$        |
| 184~291          | 246                   | 19.68        | $(\text{EG})_x$          |
| 340~426          | 401                   | 34.07        | $\text{CO}, \text{CO}_2$ |
|                  |                       | 40.39        | $\text{ZnO}$             |

**Fig. S6** TGA-DTA analysis of nanorod-shaped  $[\text{Zn}(\text{C}_2\text{O}_4)(\text{EG})_x(\text{OH}_2)_y]$  complex (Black: TGA, Blue: DTA).

### H. TGA-DTA analysis of nanorod-shaped $[\text{Zn}(\text{C}_2\text{O}_4)(\text{OH}_2)_2]$ complex

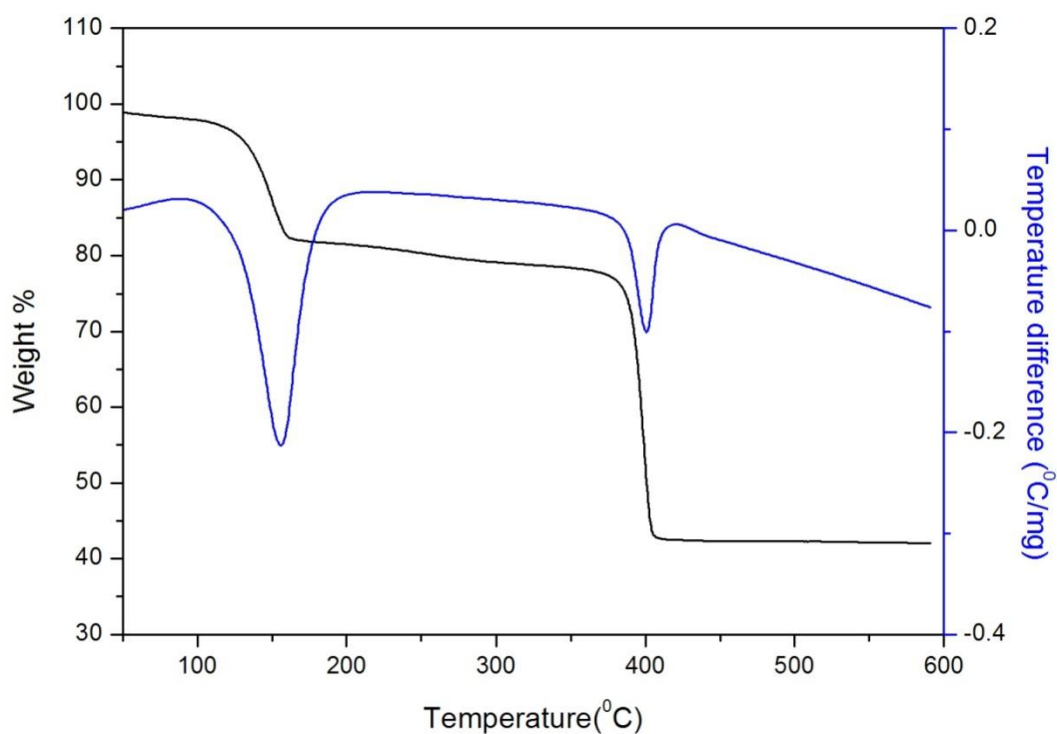

| Temperature (°C) | Endothermic peak (°C) | Weight loss     |              | Assignment          |
|------------------|-----------------------|-----------------|--------------|---------------------|
|                  |                       | Theoretical (%) | Observed (%) |                     |
| 93~207           | 156                   | 19.02           | 17.02        | 2(OH <sub>2</sub> ) |
| 363~442          | 401                   | 38.02           | 36.29        | CO, CO <sub>2</sub> |
|                  |                       | 42.96           | 42.49        | ZnO                 |

**Fig. S7** TGA-DTA analysis of nanorod-shaped  $[\text{Zn}(\text{C}_2\text{O}_4)(\text{OH}_2)_2]$  complex (Black: TGA, Blue: DTA).

I. The corresponding geometric structure of nanorod-shaped  $[\text{Zn}(\text{C}_2\text{O}_4)(\text{OH}_2)_2]$  complex

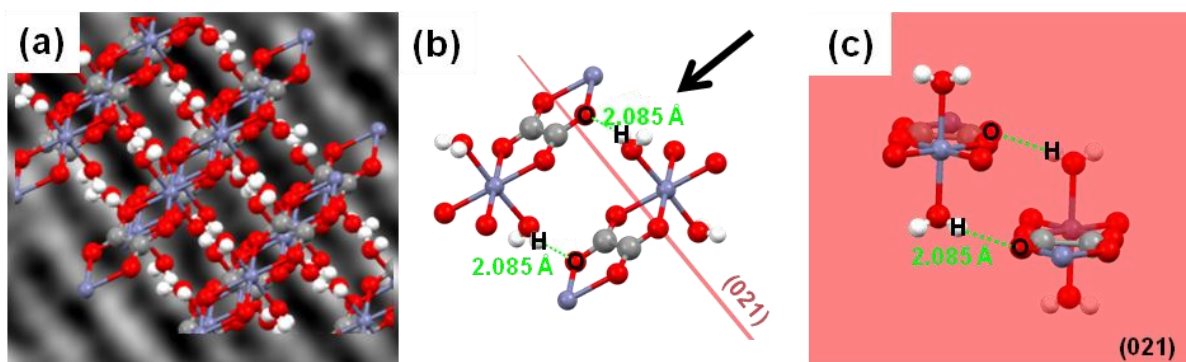

**Fig. S8** (a) The geometric structure of  $[\text{Zn}(\text{C}_2\text{O}_4)(\text{OH}_2)_2]$  corresponding with TEM image (Fig. 2f), (b) one repeating-unit of  $[\text{Zn}(\text{C}_2\text{O}_4)(\text{OH}_2)_2]$ ; red line indicates the (021) face, and (c) when viewed from the black arrow direction of (b), two different  $[\text{Zn}(\text{C}_2\text{O}_4)(\text{OH}_2)_2]$  chain interact with each other by H-bond.

### J. Change of Zn-O distance, hydrogen bond distance and hydrogen bond angle

|                           | [Zn(C <sub>2</sub> O <sub>4</sub> )(EG)] <sup>a</sup> | [Zn(C <sub>2</sub> O <sub>4</sub> )(OH <sub>2</sub> ) <sub>2</sub> ] <sup>b</sup> |
|---------------------------|-------------------------------------------------------|-----------------------------------------------------------------------------------|
| Unit cell                 | Orthorhombic                                          | Monoclinic                                                                        |
| Zn-O (Å)                  | 2.066(4)                                              | 2.118                                                                             |
| O-H···O <sup>i</sup> (Å)  | 1.88(2)                                               | 2.008                                                                             |
| O-H···O <sup>i</sup> (°)  | 170(7)                                                | 157.01                                                                            |
| O-H···O <sup>ii</sup> (Å) | 1.91(2)                                               | 2.085                                                                             |
| O-H···O <sup>ii</sup> (°) | 169(6)                                                | 158.78                                                                            |

<sup>a</sup> Data adapted from reference [S1], <sup>b</sup> Modified from reference [S2]

**Table S1** Zn-O distance, hydrogen bond distances and the hydrogen bond angles caused by change of unit cell structure from orthorhombic to monoclinic.

## **K. Experimental information**

### **Synthesis of nanosheet-shaped [Co(C<sub>2</sub>O<sub>4</sub>)(EG)] complex**

Oxalic acid (1.00 mmol, H<sub>2</sub>C<sub>2</sub>O<sub>4</sub>) was dissolved in ethylene glycol (15 mL), followed by the addition of cobalt sulfate (1.00 mmol, CoSO<sub>4</sub>) and ca. 0.70 g 3 Å molecular sieves. After stirring for 2 h, the white precipitate was washed with 33 mL of anhydrous tetrahydrofuran (THF) and isolated by centrifugation for 3 times (≤ 0.48 mmol of water). The obtained powder was dried in a vacuum oven at 60 °C overnight.

\* Anhydrous THF was used in the consideration of the tough nature that azeotropic mixture is hard to be separated from water, even though the same phenomenon was observed upon using anhydrous ethanol. As a result of the study, it was observed that solvents with water excluded as much as possible, such as anhydrous methanol, anhydrous ethanol, and anhydrous THF, bring the same result.

### **Synthesis of nanorod-shaped [Co(C<sub>2</sub>O<sub>4</sub>)(EG)<sub>x</sub>(OH<sub>2</sub>)<sub>y</sub>] complex**

Oxalic acid (1.00 mmol, H<sub>2</sub>C<sub>2</sub>O<sub>4</sub>) was dissolved in ethylene glycol (15 mL), followed by the addition of cobalt sulfate (1.00 mmol, CoSO<sub>4</sub>) and ca. 0.70 g 3 Å molecular sieves. After stirring for 2 h, the white precipitate was washed with 33 mL of ethanol (94%) and isolated by for 3 times (≤ 260 mmol of water). The obtained powder was dried in a vacuum oven at 60 °C overnight.

### **Synthesis of nanorod-shaped [Co(C<sub>2</sub>O<sub>4</sub>)(OH<sub>2</sub>)<sub>2</sub>] complex**

Oxalic acid (1.00 mmol, H<sub>2</sub>C<sub>2</sub>O<sub>4</sub>) was dissolved in ethylene glycol (15 mL), followed by the addition of cobalt sulfate (1.00 mmol, CoSO<sub>4</sub>) and ca. 0.70 g 3 Å molecular sieves. After stirring for 2 h, the white precipitate was washed with 33 mL of ethanol (94%) and isolated by centrifugation for 4 times (≤ 350 mmol of water). The obtained powder was dried in a vacuum oven at 60 °C overnight.

### **Synthesis of porous Co<sub>3</sub>O<sub>4</sub> structures**

The as-prepared cobalt oxalate structures were annealed in air at 500 °C for 2 h at a heating rate of 2 °C/min for converting to the porous Co<sub>3</sub>O<sub>4</sub> structures.

**L. SEM, XRD and TGA analyses of  $[\text{Co}(\text{C}_2\text{O}_4)(\text{EG})]$  complex and FT-IR spectra of the synthesized-samples**

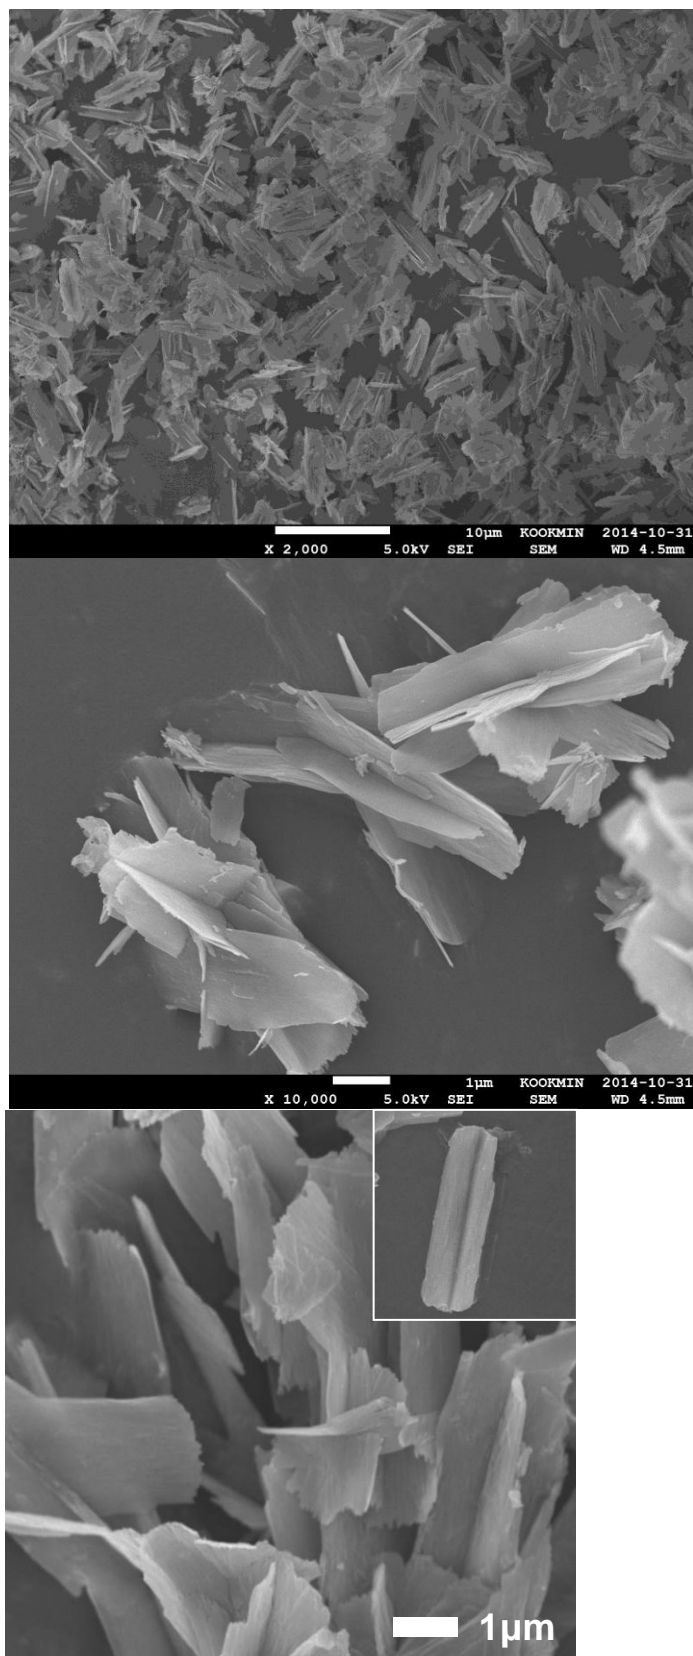

**Fig. S9** SEM images of nanosheet-shaped  $[\text{Co}(\text{C}_2\text{O}_4)(\text{EG})]$  complex.

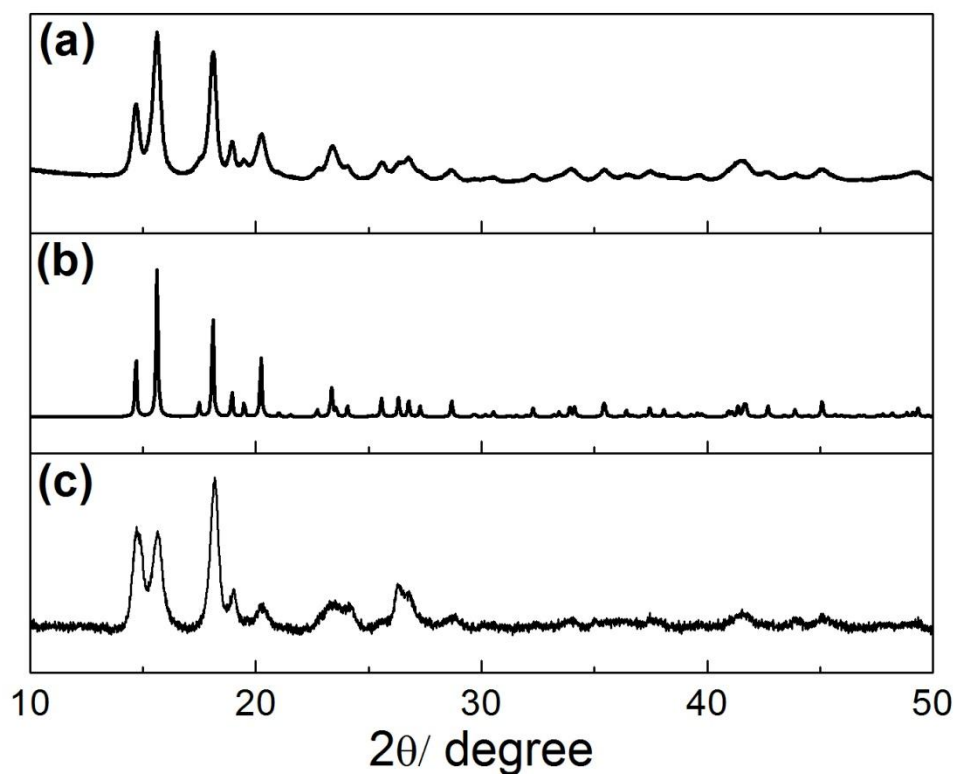

**Fig. S10** XRD patterns of (a) nanosheet-shaped  $[\text{Zn}(\text{C}_2\text{O}_4)(\text{EG})]$ , (b) single crystal  $[\text{Zn}(\text{C}_2\text{O}_4)(\text{EG})]$ , and (c) nanosheet-shaped  $[\text{Co}(\text{C}_2\text{O}_4)(\text{EG})]$  : the synthesized- $[\text{Co}(\text{C}_2\text{O}_4)(\text{EG})]$  has the same XRD pattern as the synthesized- $[\text{Zn}(\text{C}_2\text{O}_4)(\text{EG})]$  and the different intensities are attributed to different crystal size [S3].

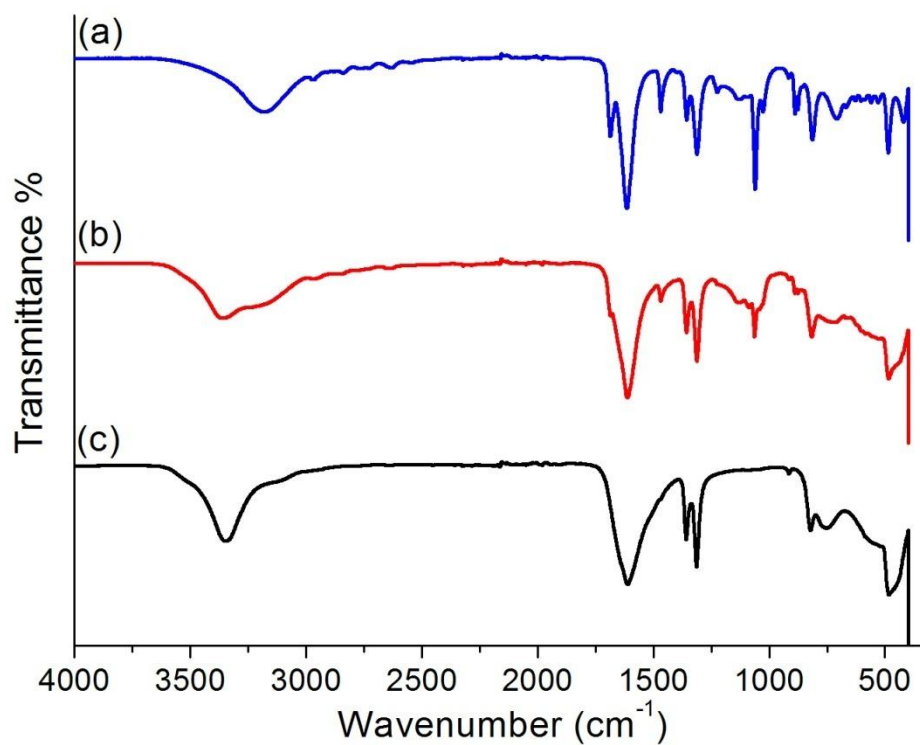

| (a)       | (b)       | (c)  | Assignment                        |
|-----------|-----------|------|-----------------------------------|
|           | 3363      | 3348 | O-H stretch                       |
| 3180      | 3180      |      |                                   |
| 2800~3000 | 2800~3000 |      | C-H stretch (alkane)              |
| 1686      | 1686      |      | C=O stretch                       |
| 1615      | 1614      | 1612 |                                   |
| 1470      | 1469      |      | C-H bend (alkane)                 |
| 1357      | 1357      | 1358 | symmetric and asymmetric<br>O-C-O |
| 1312      | 1313      | 1314 |                                   |
| 1061      | 1063      |      | O-C stretch                       |
| 814       | 817       | 822  | asymmetric O-C-O band             |
| 486       | 485       | 484  | Co-O stretch                      |

**Fig. S11** FT-IR spectra of (a) nanosheet-shaped  $[\text{Co}(\text{C}_2\text{O}_4)(\text{EG})]$  complex, (b) nanorod-shaped  $[\text{Co}(\text{C}_2\text{O}_4)(\text{EG})_x(\text{OH}_2)_y]$  complex, and (c) nanorod-shaped  $[\text{Co}(\text{C}_2\text{O}_4)(\text{OH}_2)_2]$  complex.



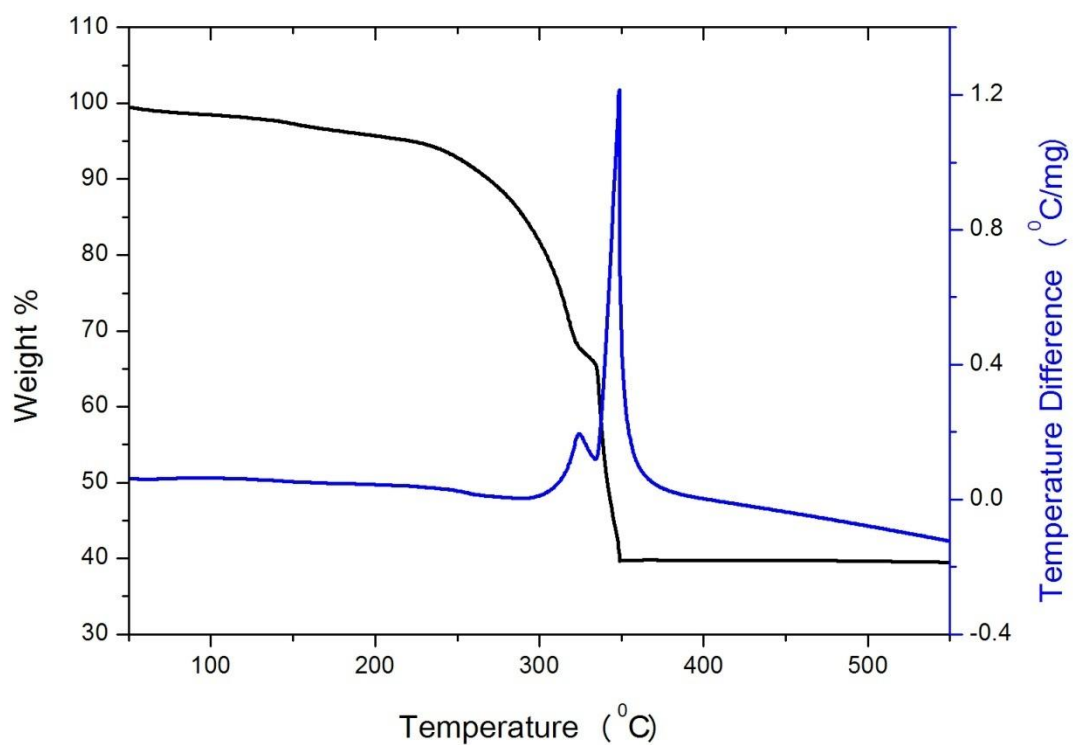

| Temperature (°C) | Weight loss     |              | Assignment                     |
|------------------|-----------------|--------------|--------------------------------|
|                  | Theoretical (%) | Observed (%) |                                |
| ~328             | 29.70           | 30.20        | EG                             |
| 328~360          | 38.40           | 38.43        | Co <sub>3</sub> O <sub>4</sub> |

**Fig. S12** TGA-DTA analysis of nanosheet-shaped [Co(C<sub>2</sub>O<sub>4</sub>)(EG)] complex (Black: TGA, Blue: DTA).

M. SEM, XRD, HR-TEM, FTT and TGA analyses of nanorod-shaped  $[\text{Co}(\text{C}_2\text{O}_4)(\text{EG})_x(\text{OH}_2)_y]$  and nanorod-shaped  $[\text{Co}(\text{C}_2\text{O}_4)(\text{OH}_2)_2]$

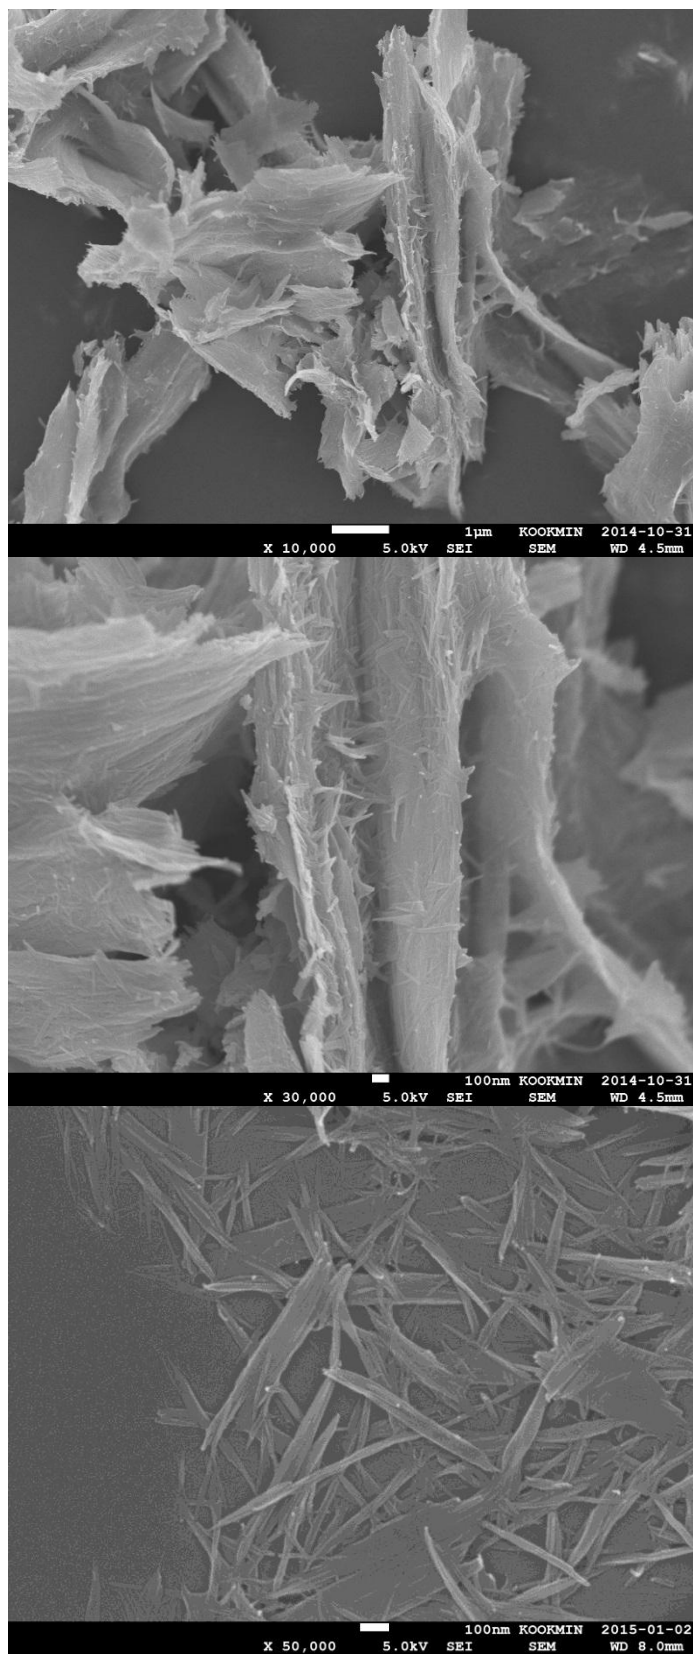

**Fig. S13** SEM images of nanorod-shaped  $[\text{Co}(\text{C}_2\text{O}_4)(\text{EG})_x(\text{OH}_2)_y]$  and  $[\text{Co}(\text{C}_2\text{O}_4)(\text{OH}_2)_2]$  complex.

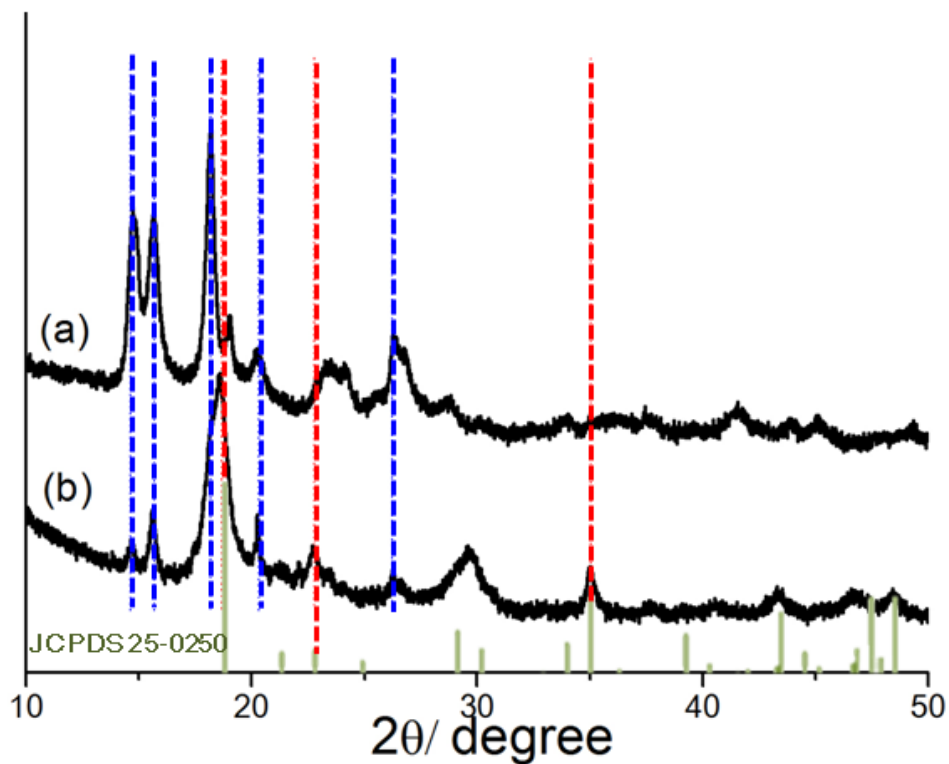

**Fig. S14** XRD patterns of (a) nanosheet-shaped  $[\text{Co}(\text{C}_2\text{O}_4)(\text{EG})]$ , (b) nanorod-shaped  $[\text{Co}(\text{C}_2\text{O}_4)(\text{EG})_x(\text{OH}_2)_y]$ , and the well-known  $[\text{Co}(\text{C}_2\text{O}_4)(\text{OH}_2)_2]$  (JCPDS 25-0250): Blue lines indicate  $[\text{Co}(\text{C}_2\text{O}_4)(\text{EG})]$  complex and Red lines indicate  $[\text{Co}(\text{C}_2\text{O}_4)(\text{OH}_2)_2]$  complex. **Fig. S13** indicates that adding  $\text{OH}_2$  to  $[\text{Co}(\text{C}_2\text{O}_4)(\text{EG})]$  renders the ligands, EG, switched to  $\text{OH}_2$ .

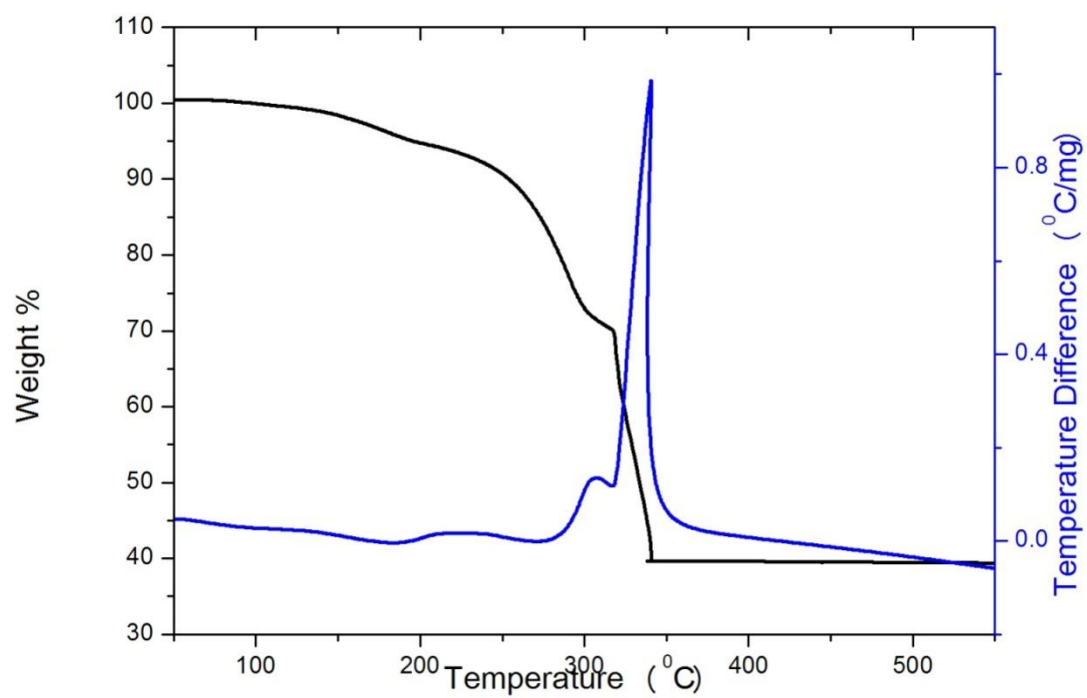

| Temperature (°C) | Endothermic peak (°C) | Weight loss  | Assignment                     | Ratio |
|------------------|-----------------------|--------------|--------------------------------|-------|
|                  |                       | Observed (%) |                                |       |
| 125 ~ 215        | 183                   | 4.85         | OH <sub>2</sub>                | 1     |
| 237 ~ 306        | 271                   | 22.58        | EG                             | 1.35  |
|                  |                       | 39.67        | Co <sub>3</sub> O <sub>4</sub> | -     |

**Fig. S15** TGA-DTA analysis of nanorod-shaped  $[\text{Co}(\text{C}_2\text{O}_4)(\text{EG})_x(\text{OH}_2)_y]$  complex (Black: TGA, Blue: DTA).

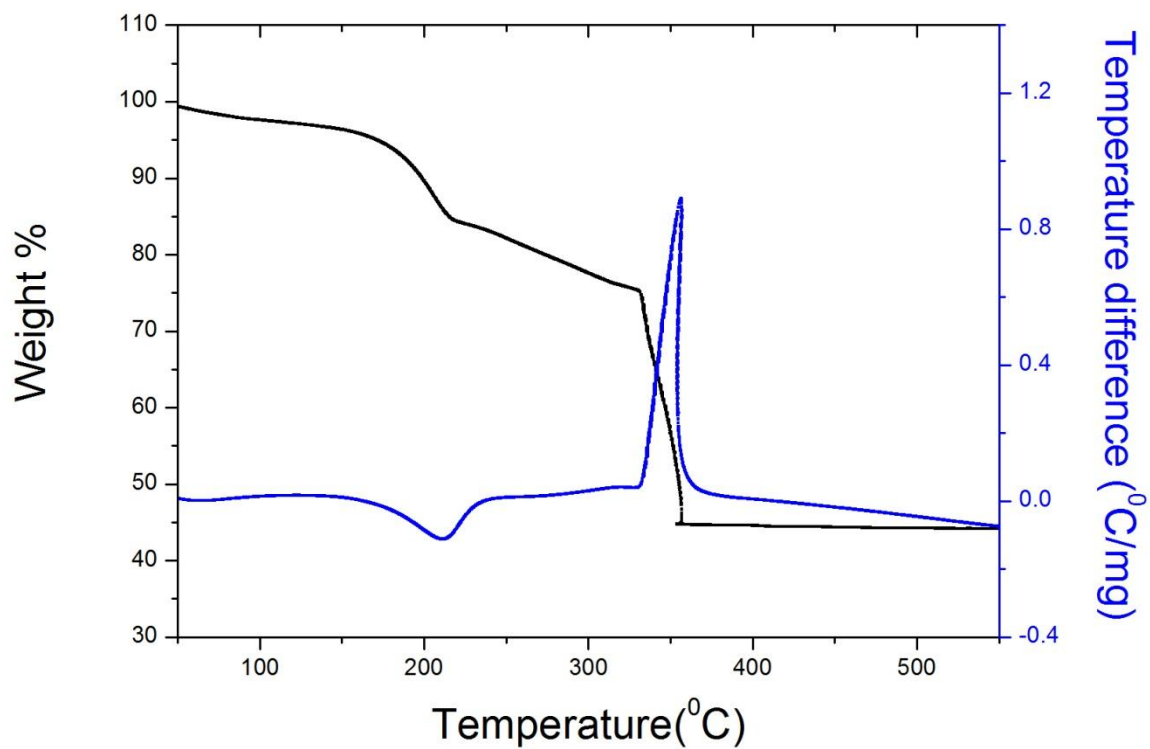

| Temperature (°C) | Endothermic peak (°C) | Weight loss     |              | Assignment                     |
|------------------|-----------------------|-----------------|--------------|--------------------------------|
|                  |                       | Theoretical (%) | Observed (%) |                                |
| 143 ~ 231        | 180                   | 19.69           | 18.64        | OH <sub>2</sub>                |
|                  |                       | 43.87           | 44.32        | Co <sub>3</sub> O <sub>4</sub> |

**Fig. S16** TGA-DTA analysis of nanorod-shaped [Co(C<sub>2</sub>O<sub>4</sub>)(OH<sub>2</sub>)<sub>2</sub>] complex (Black: TGA, Blue: DTA).

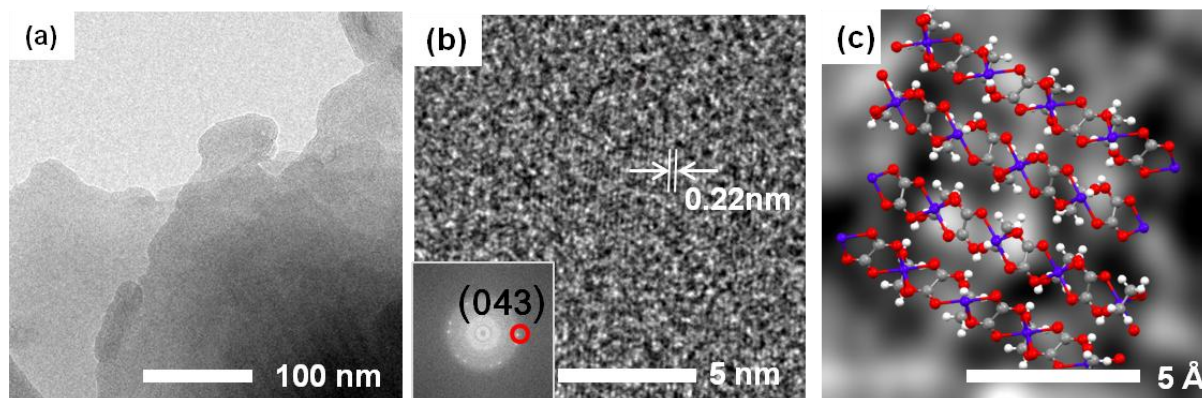

**Fig. S17** (a) TEM, (b) HR-TEM, (b, inset) FTT images of nanosheet-shaped  $[\text{Co}(\text{C}_2\text{O}_4)(\text{EG})]$ , and (c) the  $[\text{Co}(\text{C}_2\text{O}_4)(\text{EG})]$  molecular structure is overlaid on the image's (043) surface obtained by HR-TEM (white : hydrogen, grey : carbon, red : oxygen, and purple : cobalt). The structure consisting the surface is interacted by the H-bond between EG and Oxalate in the same way as  $[\text{Zn}(\text{C}_2\text{O}_4)(\text{EG})]$ .

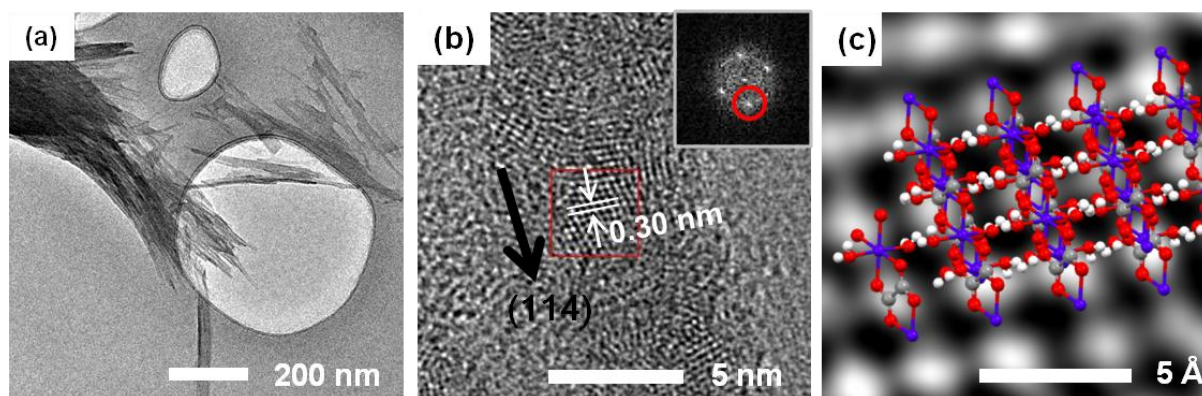

**Fig. S18** (a) TEM, (b) HR-TEM, (b, inset) FTT images and (c) (114) face's molecular structure of nanorod-shaped  $[\text{Co}(\text{C}_2\text{O}_4)(\text{OH}_2)_2]$  (grey : carbon, red : oxygen, purple : cobalt, and hydrogen atoms are omitted for clarity). The structure consisting the surface is interacted by the H-bond between  $\text{OH}_2$  and Oxalate in the same way as  $[\text{Zn}(\text{C}_2\text{O}_4)(\text{OH}_2)_2]$ .

N. SEM, HR-TEM, FTT images and XRD graphs of the prepared-ZnO samples

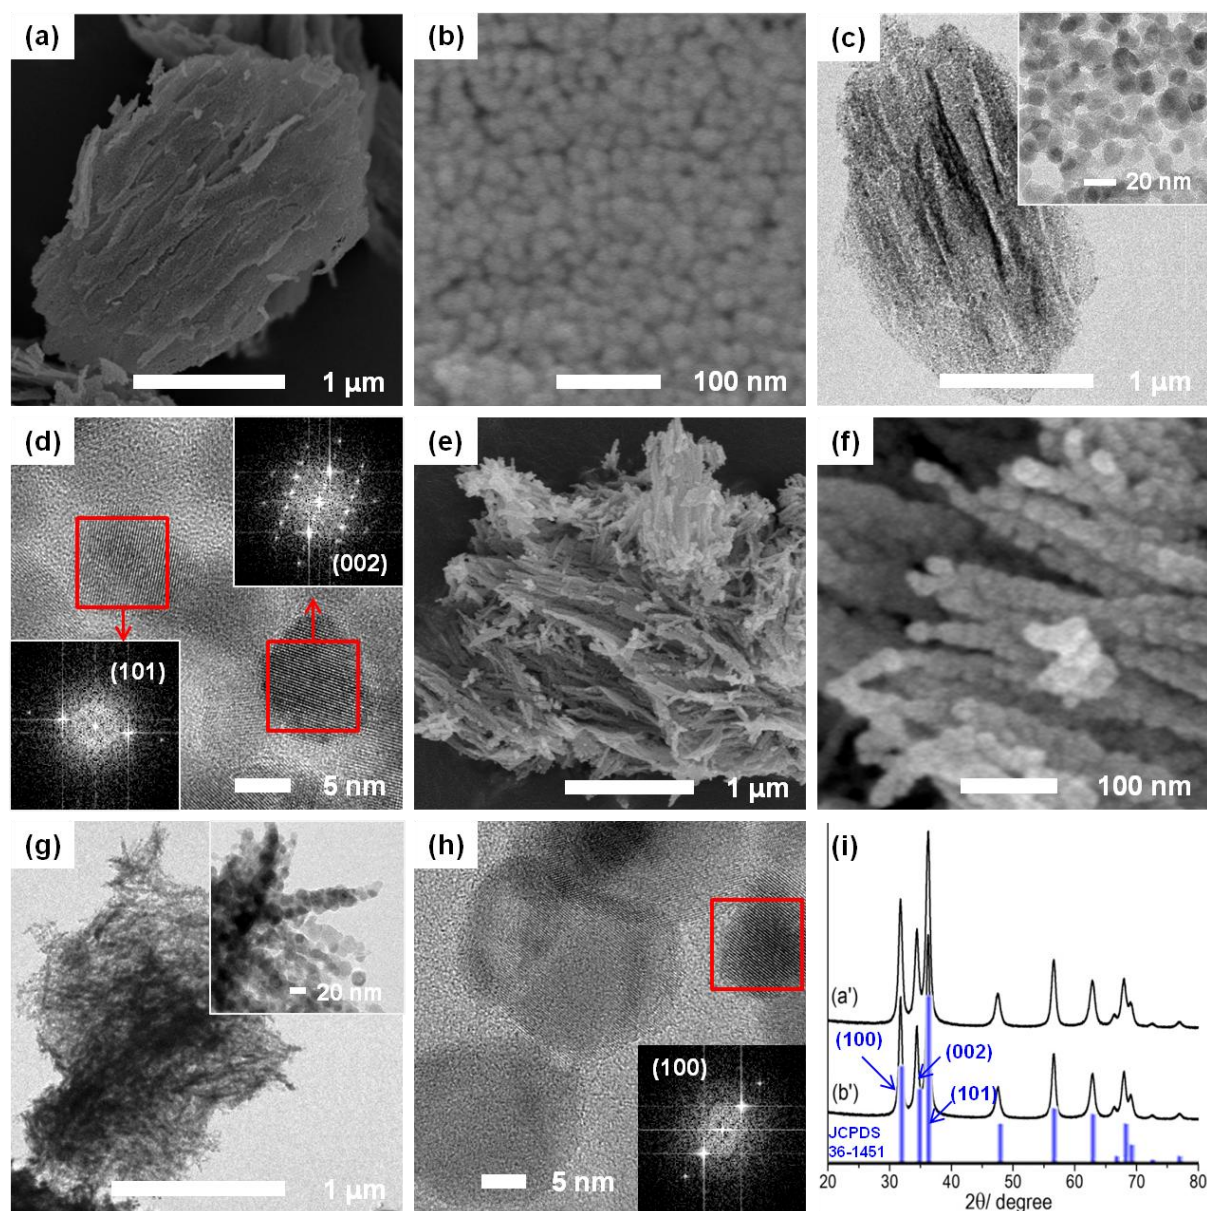

**Fig. S19** (a and b) SEM images, (c and d) TEM, HR-TEM and FTT-TEM images of nanosheet-shaped ZnO from  $[\text{Zn}(\text{C}_2\text{O}_4)(\text{EG})]$  precursor, (e and f) SEM images, (g and h) TEM, HR-TEM and FTT-TEM images of nanorod-shaped ZnO from  $[\text{Zn}(\text{C}_2\text{O}_4)(\text{OH}_2)_2]$  precursor, and (i) XRD patterns of ZnO samples; (a') nanosheet-shaped ZnO from  $[\text{Zn}(\text{C}_2\text{O}_4)(\text{EG})]$  precursor, (b') nanorod-shaped ZnO from  $[\text{Zn}(\text{C}_2\text{O}_4)(\text{OH}_2)_2]$  precursor and JCPDS No. 36-1451 of ZnO.

O. SEM, HR-TEM, FTT images and XRD graphs of the prepared- $\text{Co}_3\text{O}_4$

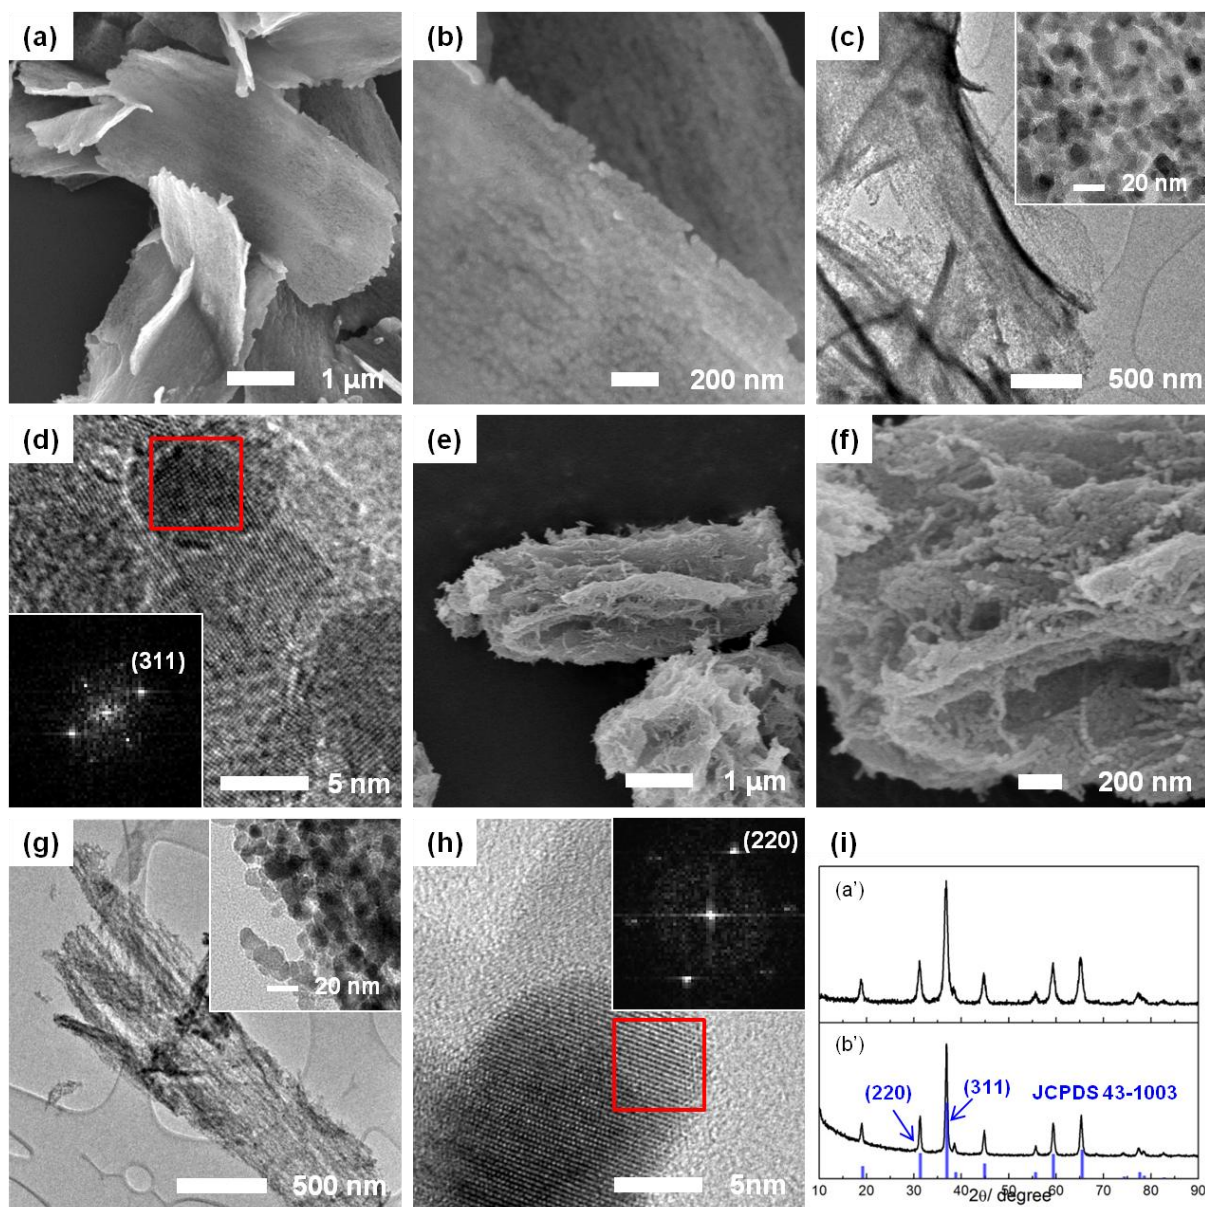

**Fig. S20** (a and b) SEM images, (c and d) TEM, HR-TEM and FTT-TEM images of nanosheet-shaped  $\text{Co}_3\text{O}_4$  from  $[\text{Co}(\text{C}_2\text{O}_4)(\text{EG})]$  precursor, (e and f) SEM images, (g and h) TEM, HR-TEM and FTT-TEM images of nanorod-shaped  $\text{Co}_3\text{O}_4$  from  $[\text{Co}(\text{C}_2\text{O}_4)(\text{OH}_2)_2]$  precursor, and (i) XRD patterns of  $\text{Co}_3\text{O}_4$  samples; (a') nanosheet-shaped  $\text{Co}_3\text{O}_4$  from  $[\text{Co}(\text{C}_2\text{O}_4)(\text{EG})]$  precursor, (b') nanorod-shaped  $\text{Co}_3\text{O}_4$  from  $[\text{Co}(\text{C}_2\text{O}_4)(\text{OH}_2)_2]$  precursor and JCPDS No. 43-1003 of  $\text{Co}_3\text{O}_4$ .



## P. BET analysis of the prepared-metal oxide samples

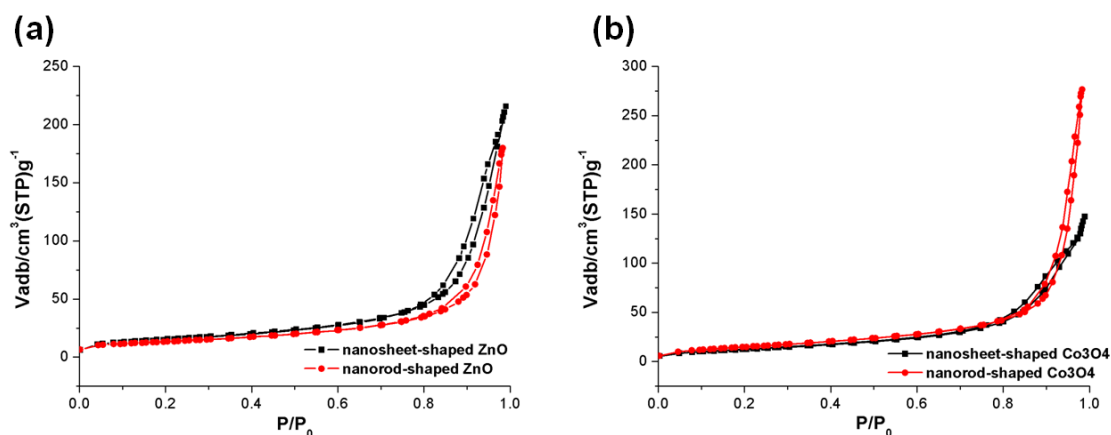

**Fig. S21**  $\text{N}_2$  adsorption-desorption isotherms of samples (a) nanosheet-shaped ZnO and nanorod-shaped ZnO, and (b) nanosheet-shaped  $\text{Co}_3\text{O}_4$  and nanorod-shaped  $\text{Co}_3\text{O}_4$ .

## References:

[S1] Tan, Z.-D., Tan, F.-J., Tan, B. & Zhang, C.-M. catena-Poly[(ethanediol- $\kappa^2O,O'$ )zinc]- $\nu$ -oxalato- $\kappa^4O^1,O^2:O^1',O^2'$ ]. *Acta Cryst.* **E68**, m868 (2012).

[S2] Giester, G. Syntheses and crystal structures of  $\text{Co}_3(\text{C}_2\text{O}_4)(\text{SeO}_3)_2$  and  $\text{Zn}(\text{C}_2\text{O}_4)\cdot 2\text{H}_2\text{O}$ . *Z. Kristallogr* **212**, 720-723 (1997).

[S3] Inoue, M. & Hirasawa, I. The relationship between crystal morphology and XRD peak intensity on  $\text{CaSO}_4\cdot 2\text{H}_2\text{O}$ . *J. Cryst. Growth.* **380**, 169-175 (2013).
